# Supplementary material for: PPAR gamma 2 Prevents Lipotoxicity by Controlling Adipose Tissue Expandability and Peripheral Lipid Metabolism
Source: PLoS Genet. 2007 Apr 27;3(4):e64. doi: 10.1371/journal.pgen.0030064 (PMC1857730; doi:10.1371/journal.pgen.0030064)
Supplement: Table S2 — (105 KB DOC) [file pgen.0030064.st002.doc]

| Table S2: Microarray data | | | | | | | | |
| --- | --- | --- | --- | --- | --- | --- | --- | --- |
| Tissue | WAT | | liver | | muscle | |  |  |
| Genbank Accession | ratio | p | ratio | p | ratio | p | Common name | description |
| NM_009204 | 1.08 | 0.852 | 0.67 | 0.365 | 1.17 | 0.773 | Slc2a4; glut4 | solute carrier family 2 (facilitated glucose transporter), member 4 |
| NM_013459 | **0.33** | **0.038** | 1.05 | 0.792 | 0.65 | 0.122 | Adn | adipsin |
| K02109 | 1.36 | 0.230 | 0.79 | 0.402 | 0.85 | 0.082 | Fabp4; aP2 | fatty acid binding protein 4, adipocyte |
| NM_011044 | **1.97** | **0.015** | **1.48** | **0.013** | 0.90 | 0.143 | Pck1 | phosphoenolpyruvate carboxykinase 1, cytosolic |
| NM_020509 | **4.30** | **0.003** | 0.81 | 0.306 | 1.09 | 0.572 | Retnla | resistin like alpha |
| AF127033 | 0.95 | 0.610 | 0.66 | 0.065 | 0.85 | 0.416 | Fasn | fatty acid synthase |
| NM_009127 | **0.43** | **0.0001** | **0.31** | **0.0001** | **0.58** | **0.00004** | Scd1 | stearoyl-Coenzyme A desaturase 1 |
| NM_011435 | **1.23** | **0.002** | 0.88 | 0.176 | 0.93 | 0.344 | Sod3 | superoxide dismutase 3, extracellular |
| NM_008161 | **2.07** | **0.001** | 1.29 | 0.232 | 0.91 | 0.394 | Gpx3 | glutathione peroxidase 3 |
| NM_008182 | 0.97 | 0.782 | 0.81 | 0.070 | **2.56** | **0.007** | Gsta2 | glutathione S-transferase, alpha 2 (Yc2) |
| NM_008183 | **1.80** | **0.001** | **0.75** | **0.044** | 0.88 | 0.226 | Gstm2 | glutathione S-transferase, mu 2 |
| NM_013541 | 1.16 | 0.097 | 1.02 | 0.910 | **1.10** | **0.014** | Gstp2 | glutathione S-transferase, pi 2 |
| NM_008185 | **1.85** | **0.010** | 0.94 | 0.722 | **1.20** | **0.0001** | Gstt1 | glutathione S-transferase, theta 1 |
| NM_008180 | **0.72** | **0.005** | 0.98 | 0.904 | 1.24 | 0.134 | Gss | glutathione synthetase |
| NM_010363 | **1.71** | **0.002** | 0.96 | 0.735 | 1.08 | 0.563 | Gstz1 | glutathione transferase zeta 1 (maleylacetoacetate isomerase) |
| NM_019946 | **1.23** | **0.046** | 0.84 | 0.132 | 1.03 | 0.740 | Mgst1 | microsomal glutathione S-transferase 1 |
| NM_009853 | **0.69** | **0.027** | **0.50** | **0.006** | 0.91 | 0.842 | Cd68 | CD68 antigen |
| NM_021460 | **0.48** | **0.001** | **0.73** | **0.042** | 0.94 | 0.409 | Lip1 | lysosomal acid lipase 1 |
| NM_013737 | **0.68** | **0.027** | 0.98 | 0.906 | 0.83 | 0.228 | Pla2g7 | phospholipase A2 group VII (platelet-activating factor acetylhydrolase, plasma) |
| NM_008867 | **0.70** | **0.035** | 0.90 | 0.390 | 1.17 | 0.470 | Pla2g1br | phospholipase A2, group IB, pancreas, receptor |
| AF233885 | 0.99 | 0.931 | 1.00 | 0.980 | **1.34** | **0.020** | Plce1 | phospholipase C, epsilon 1 |
| NM_011116 | **0.72** | **0.003** | 0.87 | 0.103 | 0.88 | 0.511 | Pld3 | phospholipase D3 |
| NM_010570 | 1.06 | 0.783 | 1.14 | 0.484 | 1.02 | 0.914 | Irs1 | insulin receptor substrate 1 |
| NM_007381 | 1.19 | 0.221 | 1.16 | 0.476 | 0.82 | 0.118 | Acadl | acetyl-Coenzyme A dehydrogenase, long-chain |
| NM_015729 | 0.94 | 0.520 | 1.02 | 0.890 | **0.76** | **0.041** | Acox1 | acyl-Coenzyme A oxidase 1, palmitoyl |

Table S2. Expression ratios and p values for the microarray, comparing mRNA in three different tissues between the POKO and the ob/ob mice. Values in bold indicate p  0.05; those in grey have p > 0.05

# Methodology for Microarrays

*Global amplification* *using template-switching PCR and labelling of cDNA probes for arrays*

cDNA was amplified from total RNA from epididymal WAT, liver and skeletal muscle of ob/ob and POKO genotypes (n=4-7) using template-switching PCR and labeled with Cy3 or Cy5 dyes as previously described [1]. The labeled products were individually purified on AutoSeq G-50 columns; then the Cy5 and Cy3 samples were pooled and ethanol precipitated.

*Hybridization of labelled probes to oligonucleotide arrays.*

The arrays utilized in this study are the Compugene Mouse Known Gene set of 7,524 oligonucleotides that were printed on glass slides by the Microarray group at the MRC-HGMP, Hinxton (http://www.hgmp.mrc.uk/Research/Microarray/index.jsp). For each set of conditions tested, duplicate and dye-swap hybridizations were performed. Labeled targets were resuspended in 30 l of hybridization buffer (40% formamide, 5x SSC, 5x Denhardt's solution, 1 mM sodium pyrophosphate, 50 mM Tris pH 7.4, 0.1% SDS) together with 2 g mouse Cot1 DNA (Invitrogen), denatured at 95°C for 5 min, incubated at 50°C for 5 min and then centrifuged at 13,000 r.p.m. for 5 min before being applied to the arrays. Hybridizations were performed under a coverslip at 50°C in a humidified chamber for 16 h. Following hybridization, slides were washed twice in 2x SSC for 10 min, twice in 0.1x SSC/0.1% SDS for 5 min and finally twice in 0.1x SSC for 5 min; all washes were performed at room temperature. After washing, slides were dried by centrifugation at 2000 g for 3 min.

Arrays were scanned on an Agilent G2565 scanner according to manufacturer’s instructions. Raw image data were extracted using ImageneTM 5.0 software (BioDiscovery). Data were imported into GeneSpringTM 6.2 (Silicon Genetics) for analysis. Normalization was performed using the Loess algorithm. Genes with ratios significantly different from 1 were identified using a t-test at the 95% confidence level.

### Reference

### 1. Petalidis, L., Bhattacharyya, S., Morris, G.A., Collins, V.P., Freeman, T.C., Lyons, P.A. (2003) Global amplification of mRNA by template-switching PCR: linearity and application to microarray analysis*. Nucleic Acids R*es 31, e142.
