# Supplementary material for: PPAR gamma 2 Prevents Lipotoxicity by Controlling Adipose Tissue Expandability and Peripheral Lipid Metabolism
Source: PLoS Genet. 2007 Apr 27;3(4):e64. doi: 10.1371/journal.pgen.0030064 (PMC1857730; doi:10.1371/journal.pgen.0030064)
Supplement: Table S3 — (112 KB XLS) [file pgen.0030064.st003.xls]

## Sheet: summary
Table S3: Pathway analysis from microarray data			WAT 1.3 up	177	WAT 1.3 down	172	muscle 1.3 up	92	muscle 1.3 down	67	liver 1.3 up	99	liver 1.3 down	110
Pathway	source	genes in pathway that mapped to our microarray	binomial p	hits	binomial p	hits	binomial p	hits	binomial p	hits	binomial p	hits	binomial p	hits
acetyl-CoA metabolism	Gene Ontology	24	0.435326	1	0.106918	2	0.0359271	2	1	0	1	0	0.298948	1
acid-D-amino acid ligase	Gene Ontology	16	1	0	0.309295	1	1	0	1	0	1	0	0.00180439	3
acrosome	Gene Ontology	30	0.510647	1	0.153188	2	0.0535516	2	0.237021	1	0.0609381	2	0.0102507	3
acute-phase response	Gene Ontology	33	0.0448478	3	0.0417955	3	0.335484	1	0.25743	1	1	0	0.0132182	3
acyl-CoA metabolism	Gene Ontology	24	0.435326	1	0.106918	2	0.0359271	2	1	0	1	0	0.298948	1
adenylate cyclase	Gene Ontology	18	1	0	1	0	0.0211902	2	1	0	1	0	1	0
Alanine_and_aspartate_metabolism	KEGG	13	1	0	0.259625	1	1	0	1	0	0.0132211	2	1	0
Alanine-Aspartate Metabolism	GenMAPP	11	1	0	0.224555	1	1	0	1	0	0.00962985	2	0.150107	1
alcohol catabolism	Gene Ontology	20	0.0826544	2	0.370404	1	0.000120508	4	1	0	0.233797	1	1	0
alcohol dehydrogenase	Gene Ontology	15	0.000493498	4	1	0	0.01507	2	1	0	0.180994	1	0.198964	1
alcohol dehydrogenase, zinc-dependent	Gene Ontology	11	0.0286699	2	1	0	0.127184	1	1	0	1	0	1	0
alcohol metabolism	Gene Ontology	46	0.0977379	3	0.287373	2	2.51841e-05	6	1	0	0.0238487	3	1	0
aldehyde dehydrogenase	Gene Ontology	11	0.0286699	2	1	0	0.127184	1	1	0	0.136171	1	0.150107	1
aldehyde reductase	Gene Ontology	7	0.012348	2	1	0	0.0829027	1	1	0	1	0	1	0
alpha-amylase	Gene Ontology	11	1	0	0.224555	1	1	0	1	0	0.00962985	2	1	0
amine metabolism	Gene Ontology	34	1	0	0.544925	1	0.343682	1	1	0	0.00115945	4	0.395589	1
amino acid metabolism	Gene Ontology	21	1	0	0.384822	1	1	0	1	0	0.00287643	3	0.267076	1
amino acid transport	Gene Ontology	18	1	0	0.340553	1	0.199645	1	1	0	1	0	0.00251493	3
amylase	Gene Ontology	12	1	0	0.242292	1	1	0	1	0	0.0113623	2	1	0
Androgen_and_estrogen_metabolism	KEGG	17	0.332774	1	1	0	1	0	1	0	0.0218482	2	0.222337	1
antigen presentation, endogenous antigen	Gene Ontology	19	0.0108619	3	1	0	1	0	1	0	1	0	0.245035	1
antigen processing	Gene Ontology	19	0.0108619	3	1	0	1	0	1	0	1	0	0.245035	1
arginine metabolism	Gene Ontology	12	1	0	1	0	1	0	1	0	0.0113623	2	0.162591	1
Arginine_and_proline_metabolism	GenMAPP version 2	12	1	0	0.242292	1	0.00987785	2	1	0	0.1476	1	1	0
aromatic amino acid family metabolism	Gene Ontology	12	1	0	1	0	1	0	1	0	0.0113623	2	1	0
aspartate family amino acid metabolism	Gene Ontology	9	1	0	1	0	1	0	1	0	0.00655825	2	1	0
basic amino acid transporter	Gene Ontology	20	0.0826544	2	1	0	0.0257498	2	1	0	0.233797	1	0.0357327	2
Bile_acid_biosynthesis	KEGG	20	0.378815	1	0.0787123	2	1	0	1	0	0.0294762	2	0.256137	1
Bile_acid_biosynthesis	GenMAPP version 2	5	0.112114	1	1	0	1	0	1	0	0.00209521	2	1	0
binding	Gene Ontology	94	0.655705	2	0.0227654	6	0.029579	4	1	0	0.715757	1	0.000524146	7
binding 18	Gene Ontology	72	0.245509	3	0.00691351	6	1	0	1	0	0.617903	1	0.0225021	4
binding 2	Gene Ontology	86	0.335459	3	0.0041091	7	0.0044065	5	0.181398	2	0.317196	2	0.00926138	5
binding 23	Gene Ontology	78	0.844977	1	0.00241519	7	1	0	0.15593	2	0.0862997	3	0.00623174	5
binding 3	Gene Ontology	119	0.00805427	8	0.519816	3	0.0163174	5	0.0923162	3	0.470892	2	0.00870998	6
biological_process unknown	Gene Ontology	13	1	0	0.0368748	2	1	0	1	0	0.158878	1	0.174894	1
blood coagulation	Gene Ontology	22	1	0	1	0	0.0306687	2	1	0	0.253962	1	1	0
C-21 Steroid Hormone Metabolism	GenMAPP	5	0.112114	1	1	0	1	0	1	0	0.0643464	1	0.00257667	2
C21-steroid hormone biosynthesis	Gene Ontology	7	1	0	1	0	1	0	1	0	1	0	0.00495416	2
C21-Steroid_hormone_metabolism	KEGG	5	0.112114	1	1	0	1	0	1	0	0.0643464	1	0.00257667	2
calcium ion binding	Gene Ontology	67	1	0	0.0203587	5	0.200999	2	0.454299	1	1	0	0.0776234	3
calcium ion binding 2	Gene Ontology	40	0.614625	1	0.00252445	5	0.0136567	3	0.302982	1	1	0	0.0218686	3
carbohydrate binding	Gene Ontology	39	0.0669294	3	0.0132364	4	0.0843689	2	0.296647	1	0.0955051	2	0.00030591	5
carbohydrate biosynthesis	Gene Ontology	8	1	0	1	0	1	0	1	0	0.00522665	2	1	0
carbohydrate metabolism	Gene Ontology	30	0.160214	2	0.500667	1	0.00629162	3	0.237021	1	0.0609381	2	0.358628	1
carbohydrate transport	Gene Ontology	18	1	0	1	0	1	0	1	0	0.213093	1	0.0294965	2
carbohydrate transporter	Gene Ontology	18	0.348486	1	1	0	0.0211902	2	1	0	0.213093	1	0.0294965	2
Carbon_fixation	KEGG	17	0.332774	1	1	0	0.0190516	2	1	0	0.202534	1	1	0
carbonate dehydratase	Gene Ontology	13	0.266066	1	1	0	0.0115008	2	1	0	1	0	1	0
carbon-carbon lyase	Gene Ontology	22	1	0	1	0	0.0306687	2	1	0	1	0	1	0
carbon-oxygen lyase	Gene Ontology	24	0.112089	2	1	0	0.0359271	2	1	0	1	0	1	0
carboxylic ester hydrolase	Gene Ontology	20	0.0826544	2	1	0	0.219233	1	1	0	0.0294762	2	0.256137	1
carboxypeptidase	Gene Ontology	26	0.461633	1	0.00328864	4	0.0415059	2	1	0	1	0	0.0570708	2
caspase	Gene Ontology	16	0.316685	1	0.00631371	3	1	0	1	0	1	0	1	0
cell 10	Gene Ontology	74	0.829344	1	0.0294944	5	0.232645	2	0.000561618	5	0.628029	1	0.0245599	4
cell 13	Gene Ontology	100	0.0104968	7	0.673538	2	1	0	1	0	0.73783	1	0.184639	3
cell 19	Gene Ontology	81	0.303115	3	0.0408745	5	0.264585	2	1	0	1	0	0.118858	3
cell 22	Gene Ontology	80	1	0	0.55269	2	1	0	1	0	1	0	0.0314007	4
cell 26	Gene Ontology	96	0.899458	1	0.651671	2	0.696998	1	0.00177376	5	1	0	0.0546387	4
cell 9	Gene Ontology	73	0.0976157	4	0.503607	2	0.0130514	4	0.00052831	5	0.253414	2	0.661726	1
cell activation	Gene Ontology	15	0.00572526	3	1	0	1	0	1	0	1	0	1	0
cell adhesion 2	Gene Ontology	17	0.00805214	3	0.325103	1	1	0	1	0	0.202534	1	1	0
cell cycle	Gene Ontology	84	0.322516	3	1	0	1	0	1	0	1	0	0.00842478	5
cell cycle arrest	Gene Ontology	20	0.0826544	2	1	0	1	0	1	0	1	0	0.0357327	2
cell fraction	Gene Ontology	49	0.324864	2	1	0	1	0	1	0	0.0280237	3	0.516338	1
cell organization and biogenesis	Gene Ontology	50	0.33352	2	0.686211	1	1	0	1	0	1	0	0.0384703	3
cell-matrix junction	Gene Ontology	20	0.378815	1	1	0	0.0257498	2	1	0	0.233797	1	0.256137	1
cellular_component unknown	Gene Ontology	30	1	0	0.500667	1	1	0	0.0301991	2	0.3295	1	1	0
chemoattractant	Gene Ontology	30	1	0	0.00072002	5	1	0	0.237021	1	1	0	0.00108363	4
chemokine	Gene Ontology	29	1	0	0.00482658	4	1	0	0.230097	1	1	0	0.000956924	4
chemotaxis	Gene Ontology	28	0.486721	1	0.0277196	3	1	0	0.026609	2	1	0	0.000841028	4
chloride transport	Gene Ontology	25	0.448635	1	1	0	1	0	1	0	0.0441428	2	0.309264	1
cholesterol metabolism	Gene Ontology	10	1	0	0.206406	1	0.116316	1	1	0	0.00802725	2	1	0
chromosome organization and biogenesis (sensu Eukarya)	Gene Ontology	22	1	0	0.0924964	2	1	0	1	0	1	0	0.042428	2
Circadian_rhythm	KEGG	10	1	0	1	0	1	0	1	0	0.00802725	2	1	0
Citrate_cycle_(TCA_cycle)	KEGG	14	0.00473584	3	1	0	0.0132324	2	1	0	0.170009	1	1	0
Citrate_cycle_TCA_cycle	GenMAPP version 2	7	0.153376	1	1	0	0.00349819	2	0.0610799	1	1	0	1	0
coenzyme metabolism	Gene Ontology	12	0.248378	1	0.0318907	2	0.00987785	2	1	0	1	0	1	0
coenzymes and prosthetic group metabolism	Gene Ontology	19	0.36383	1	1	0	0.0234238	2	1	0	1	0	0.245035	1
Complement_and_coagulation_cascades	KEGG	49	0.112415	3	0.105525	3	1	0	1	0	0.00430085	4	1	0
cyclin-dependent protein kinase inhibitor	Gene Ontology	10	0.0240608	2	1	0	0.116316	1	1	0	1	0	0.00982413	2
Cysteine Metabolism	GenMAPP	2	1	0	1	0	0.0244149	1	1	0	0.026248	1	1	0
cysteine protease inhibitor	Gene Ontology	10	0.211721	1	0.00170481	3	1	0	1	0	0.00802725	2	0.00982413	2
cysteine-type endopeptidase	Gene Ontology	24	0.112089	2	0.0186502	3	1	0	1	0	1	0	0.298948	1
cysteine-type peptidase	Gene Ontology	28	0.143751	2	0.0277196	3	1	0	1	0	1	0	0.339316	1
cytochrome c oxidase	Gene Ontology	23	0.104494	2	0.0996329	2	1	0	5.9768e-05	4	1	0	1	0
cytochrome P450	Gene Ontology	20	1	0	0.001281	4	1	0	1	0	1	0	0.00337713	3
cytokine	Gene Ontology	94	0.386996	3	0.0227654	6	1	0	0.207444	2	0.715757	1	0.0513349	4
cytolysis	Gene Ontology	19	0.36383	1	0.35565	1	1	0	1	0	0.223513	1	0.0325552	2
cytoplasm 2	Gene Ontology	66	0.793221	1	1	0	0.0489112	3	1	0	1	0	0.624501	1
cytoplasm 6	Gene Ontology	92	0.374173	3	0.165149	4	0.314753	2	0.00147373	5	0.3463	2	0.745326	1
cytoplasm 7	Gene Ontology	59	0.166574	3	0.395852	2	0.165591	2	0.00203196	4	0.185357	2	0.583221	1
cytoplasm 8	Gene Ontology	79	0.561361	2	0.11175	4	0.255446	2	0.510684	1	0.0888396	3	0.0301904	4
defense immunity protein	Gene Ontology	36	0.0553575	3	0.565568	1	1	0	1	0	0.381137	1	0.0166268	3
defense response	Gene Ontology	89	0.163359	4	0.00493478	7	0.669261	1	0.553254	1	1	0	0.00216919	6
defense response 2	Gene Ontology	63	0.000852663	7	0.42782	2	0.542428	1	0.434118	1	0.568854	1	0.238704	2
defense response 3	Gene Ontology	52	0.127875	3	0.033338	4	0.47525	1	0.374752	1	0.500375	1	0.00110833	5
development 4	Gene Ontology	87	0.613825	2	1	0	0.023144	4	1	0	0.68767	1	0.725553	1
dipeptidyl-peptidase	Gene Ontology	19	0.36383	1	0.0100559	3	1	0	1	0	1	0	0.245035	1
disulfide oxidoreductase	Gene Ontology	17	0.332774	1	0.0594334	2	0.0190516	2	1.85751e-05	4	1	0	1	0
eicosanoid biosynthesis	Gene Ontology	7	1	0	1	0	0.00349819	2	1	0	1	0	1	0
Eicosanoid Synthesis	GenMAPP	15	1	0	1	0	0.01507	2	1	0	1	0	1	0
Eicosanoid_Synthesis	GenMAPP version 2	21	1	0	0.384822	1	0.0281656	2	1	0	1	0	0.267076	1
electron transport	Gene Ontology	56	0.384687	2	0.371355	2	0.152626	2	0.00168262	4	0.0391743	3	0.564181	1
Electron Transport Chain	GenMAPP	36	0.575971	1	0.202496	2	0.359779	1	0.000328661	4	1	0	1	0
endomembrane system	Gene Ontology	31	1	0	0.512117	1	1	0	1	0	1	0	0.0111915	3
endopeptidase inhibitor	Gene Ontology	28	0.000602274	5	0.0277196	3	1	0	0.22311	1	0.00637782	3	0.0649596	2
endoplasmic reticulum	Gene Ontology	56	0.737209	1	0.727099	1	0.500738	1	0.397018	1	0.0391743	3	0.0507791	3
endoplasmic reticulum membrane	Gene Ontology	16	1	0	0.309295	1	1	0	0.134237	1	1	0	0.0237522	2
endosome organization and biogenesis	Gene Ontology	18	1	0	0.340553	1	1	0	1	0	1	0	0.0294965	2
endosome transport	Gene Ontology	17	1	0	0.325103	1	1	0	1	0	1	0	0.0265607	2
energy pathways	Gene Ontology	13	0.266066	1	1	0	1	0	1	0	0.0132211	2	1	0
enzyme	Gene Ontology	102	0.225674	4	0.032072	6	0.13272	3	0.603182	1	0.393862	2	0.192062	3
enzyme 11	Gene Ontology	54	0.367799	2	0.714095	1	0.029729	3	1	0	1	0	0.551012	1
enzyme 17	Gene Ontology	71	0.0281657	5	0.488962	2	0.00195154	5	0.00393272	4	1	0	0.65148	1
enzyme 18	Gene Ontology	95	0.00807925	7	0.376214	3	0.328337	2	0.00169489	5	0.00899517	5	0.410311	2
enzyme 19	Gene Ontology	73	7.30929e-05	9	1	0	0.0623041	3	1	0	0.01667	4	0.293259	2
enzyme 2	Gene Ontology	102	0.0976385	5	0.032072	6	0.13272	3	0.603182	1	0.744804	1	0.445699	2
enzyme 24	Gene Ontology	64	0.196059	3	0.0170936	5	0.548096	1	0.439231	1	0.0542706	3	0.613139	1
enzyme 25	Gene Ontology	44	0.649773	1	0.270336	2	1	0	1	0	0.0212682	3	1	0
enzyme 6	Gene Ontology	59	1	0	0.395852	2	1	0	0.413202	1	0.044547	3	0.583221	1
enzyme 7	Gene Ontology	46	0.0977379	3	0.0226634	4	1	0	1	0	1	0	0.148419	2
enzyme activator	Gene Ontology	23	0.0179924	3	0.41268	1	1	0	1	0	0.263846	1	1	0
enzyme inhibitor	Gene Ontology	39	0.000377674	6	0.0625462	3	0.0843689	2	0.296647	1	0.0155263	3	0.00279723	4
enzyme regulator	Gene Ontology	57	7.64369e-05	8	0.0441363	4	0.156925	2	0.402461	1	0.0409261	3	0.0104383	4
enzyme regulator 2	Gene Ontology	6	1	0	0.129487	1	1	0	1	0	0.00299115	2	1	0
exopeptidase	Gene Ontology	18	1	0	0.0656571	2	0.0211902	2	1	0	1	0	0.23377	1
extracellular	Gene Ontology	134	0.00509359	9	0.0132538	8	0.811933	1	0.703852	1	0.263988	3	0.00388601	7
extracellular 2	Gene Ontology	68	0.220495	3	0.0215317	5	0.0102913	4	0.459233	1	0.596826	1	0.0187129	4
extracellular matrix	Gene Ontology	70	0.232939	3	0.080285	4	0.0113448	4	1	0	0.607504	1	0.00397812	5
fatty acid biosynthesis	Gene Ontology	10	1	0	0.206406	1	0.00696995	2	0.086118	1	1	0	0.137439	1
Fatty_acid_metabolism	KEGG	39	0.0669294	3	1	0	1	0	0.0484885	2	0.0155263	3	1	0
ferric iron binding	Gene Ontology	16	0.316685	1	0.309295	1	1	0	0.134237	1	0.0195195	2	0.210736	1
flagellum (sensu Eukarya)	Gene Ontology	13	0.0388353	2	1	0	1	0	1	0	0.0132211	2	1	0
fluid transport	Gene Ontology	22	0.40774	1	1	0	1	0	1	0	0.253962	1	0.042428	2
focal adhesion	Gene Ontology	18	0.348486	1	1	0	0.0211902	2	1	0	0.213093	1	0.23377	1
galactose binding	Gene Ontology	15	0.30021	1	0.047659	2	1	0	0.126394	1	1	0	0.0210752	2
galactose binding lectin	Gene Ontology	11	0.230267	1	0.224555	1	1	0	0.0943169	1	1	0	0.0117741	2
gamma_Hexachlorocyclohexane_degradation	GenMAPP version 2	6	1	0	1	0	1	0	1	0	0.00299115	2	1	0
gas transport	Gene Ontology	19	1	0	0.35565	1	1	0	1	0	0.223513	1	0.00292645	3
globin	Gene Ontology	16	1	0	0.000563495	4	1	0	1	0	1	0	0.0237522	2
glucan biosynthesis	Gene Ontology	7	1	0	1	0	1	0	1	0	0.0040363	2	1	0
Glucocorticoid & Mineralocorticoid Metabolism	GenMAPP	4	0.0907389	1	1	0	1	0	1	0	0.0518138	1	0.00166501	2
glucose catabolism	Gene Ontology	20	0.0826544	2	0.370404	1	0.000120508	4	1	0	0.233797	1	1	0
glucose transport	Gene Ontology	15	1	0	1	0	1	0	1	0	0.180994	1	0.0210752	2
glucose transporter	Gene Ontology	18	0.348486	1	1	0	0.0211902	2	1	0	0.213093	1	0.0294965	2
glutamine family amino acid metabolism	Gene Ontology	12	1	0	1	0	1	0	1	0	0.0113623	2	0.162591	1
glutamine metabolism	Gene Ontology	11	1	0	1	0	1	0	1	0	0.00962985	2	0.150107	1
glutathione metabolism	Gene Ontology	24	0.435326	1	0.106918	2	0.0359271	2	1	0	1	0	0.298948	1
Glutathione_metabolism	GenMAPP version 2	21	0.0016981	4	0.0855191	2	0.228848	1	1	0	1	0	0.039025	2
Glycine_serine_and_threonine_metabolism	GenMAPP version 2	7	1	0	0.149385	1	1	0	1	0	0.0040363	2	1	0
glycogen biosynthesis	Gene Ontology	7	1	0	1	0	1	0	1	0	0.0040363	2	1	0
glycolysis	Gene Ontology	20	0.0826544	2	0.370404	1	0.000120508	4	1	0	0.233797	1	1	0
Glycolysis and Gluconeogenesis	GenMAPP	30	0.00600101	4	1	0	3.90386e-05	5	1	0	0.000731757	4	1	0
Glycolysis_Gluconeogenesis	GenMAPP version 2	9	1	0	0.187834	1	0.00569094	2	1	0	1	0	1	0
glycoprotein biosynthesis	Gene Ontology	33	1	0	1	0	1	0	0.0359212	2	1	0	1	0
glycosaminoglycan binding	Gene Ontology	37	0.0020461	5	0.575538	1	1	0	0.283807	1	0.0874078	2	0.0178623	3
growth factor binding	Gene Ontology	12	0.0336005	2	1	0	1	0	1	0	0.0113623	2	1	0
GTP binding	Gene Ontology	59	0.409647	2	0.00266882	6	1	0	1	0	1	0	0.0117186	4
GTPase	Gene Ontology	46	0.298739	2	0.0226634	4	1	0	1	0	1	0	0.148419	2
GTPase activator	Gene Ontology	23	0.421696	1	0.41268	1	0.247728	1	1	0	1	0	0.0459378	2
guanyl nucleotide binding	Gene Ontology	71	0.504041	2	0.00142892	7	1	0	1	0	1	0	0.0215142	4
guanyl nucleotide binding 2	Gene Ontology	46	0.298739	2	0.0226634	4	1	0	1	0	1	0	0.494273	1
guanylate cyclase	Gene Ontology	20	1	0	1	0	0.0257498	2	1	0	1	0	1	0
heat shock protein	Gene Ontology	15	0.30021	1	1	0	1	0	1	0	1	0	0.0210752	2
heme metabolism	Gene Ontology	24	0.435326	1	0.106918	2	0.0359271	2	1	0	1	0	0.298948	1
heme-copper terminal oxidase	Gene Ontology	22	1	0	0.0924964	2	1	0	5.03705e-05	4	0.253962	1	1	0
hemostasis	Gene Ontology	19	1	0	1	0	0.0234238	2	1	0	0.223513	1	1	0
heparin binding	Gene Ontology	23	0.00235559	4	0.41268	1	1	0	0.187228	1	0.263846	1	0.28848	1
hexosaminidase	Gene Ontology	10	1	0	0.206406	1	1	0	1	0	0.00802725	2	1	0
hexose catabolism	Gene Ontology	20	0.0826544	2	0.370404	1	0.000120508	4	1	0	0.233797	1	1	0
histidine family amino acid metabolism	Gene Ontology	9	1	0	1	0	1	0	1	0	0.00655825	2	1	0
Histidine_metabolism	GenMAPP version 2	5	0.00649827	2	1	0	1	0	1	0	0.0643464	1	1	0
hormone biosynthesis	Gene Ontology	8	1	0	1	0	1	0	1	0	1	0	0.00640899	2
hydrogen-translocating V-type ATPase complex	Gene Ontology	15	0.30021	1	0.047659	2	0.16935	1	1	0	0.180994	1	0.00150273	3
hydrolase	Gene Ontology	90	0.361301	3	0.00127621	8	0.305665	2	0.557305	1	0.700029	1	0.384385	2
hydrolase 2	Gene Ontology	102	0.437566	3	0.211307	4	0.35974	2	0.233871	2	0.0477095	4	0.780734	1
hydrolase 6	Gene Ontology	49	0.112415	3	0.105525	3	1	0	1	0	1	0	0.0365873	3
hydrolase 7	Gene Ontology	47	0.307469	2	0.00497388	5	0.115184	2	1	0	1	0	0.153532	2
hydrolase, acting on glycosyl bonds	Gene Ontology	26	1	0	0.121892	2	1	0	0.208948	1	0.0473426	2	0.319429	1
hydrolase, hydrolyzing N-glycosyl compounds	Gene Ontology	17	1	0	0.325103	1	1	0	0.142011	1	0.0218482	2	0.222337	1
hydrolase, hydrolyzing O-glycosyl compounds	Gene Ontology	16	1	0	0.309295	1	1	0	1	0	0.0195195	2	1	0
hydro-lyase	Gene Ontology	24	0.112089	2	1	0	0.0359271	2	1	0	1	0	1	0
IgE binding	Gene Ontology	10	0.211721	1	0.206406	1	1	0	1	0	0.00802725	2	0.137439	1
immune cell chemotaxis	Gene Ontology	23	0.421696	1	0.0166893	3	1	0	0.0184757	2	1	0	0.00497494	3
immune response	Gene Ontology	76	0.036085	5	0.00887642	6	0.610924	1	0.14968	2	1	0	0.000980697	6
immunoglobulin binding	Gene Ontology	10	0.211721	1	0.206406	1	1	0	1	0	0.00802725	2	0.137439	1
inflammatory response	Gene Ontology	31	0.16857	2	0.0060833	4	0.318784	1	0.243885	1	0.338393	1	0.00122167	4
innate immune response	Gene Ontology	31	0.16857	2	0.0060833	4	0.318784	1	0.243885	1	0.338393	1	0.00122167	4
inner membrane	Gene Ontology	35	1	0	0.0092114	4	0.35178	1	0.000295618	4	1	0	0.0950891	2
insulin-like growth factor binding	Gene Ontology	12	0.0336005	2	1	0	1	0	1	0	0.0113623	2	1	0
intracellular 12	Gene Ontology	118	0.00223198	9	0.935942	1	1	0	1	0	0.466517	2	0.521939	2
intracellular 4	Gene Ontology	68	0.802908	1	0.793655	1	0.0102913	4	1	0	1	0	0.635532	1
intracellular 8	Gene Ontology	79	0.0414339	5	0.27586	3	0.016937	4	0.000752421	5	0.0888396	3	0.690706	1
intracellular 9	Gene Ontology	60	0.761226	1	0.162569	3	0.169956	2	0.00215876	4	0.551158	1	0.589382	1
intracellular signaling cascade 2	Gene Ontology	33	0.544472	1	0.00754079	4	1	0	0.25743	1	1	0	0.0861177	2
iron binding	Gene Ontology	18	0.348486	1	0.340553	1	0.0211902	2	0.149715	1	0.0242861	2	0.23377	1
kinase	Gene Ontology	56	0.384687	2	0.727099	1	0.032584	3	1	0	1	0	0.564181	1
kinase inhibitor	Gene Ontology	16	0.0561989	2	1	0	0.0170106	2	1	0	1	0	0.0237522	2
Krebs-TCA Cycle	GenMAPP	11	0.230267	1	1	0	0.000367104	3	1	0	0.136171	1	1	0
lectin	Gene Ontology	27	0.135664	2	0.129561	2	0.0444096	2	1	0	0.0506247	2	0.0609709	2
leukotriene biosynthesis	Gene Ontology	7	1	0	1	0	0.00349819	2	1	0	1	0	1	0
ligase	Gene Ontology	43	0.641297	1	0.261812	2	1	0	1	0	0.436423	1	0.0263259	3
ligase, forming aminoacyl-tRNA and related compounds	Gene Ontology	13	1	0	1	0	1	0	1	0	1	0	0.0161341	2
ligase, forming carbon-carbon bonds	Gene Ontology	19	0.36383	1	0.0720876	2	1	0	1	0	0.223513	1	0.0325552	2
Limonene_and_pinene_degradation	KEGG	16	0.316685	1	1	0	1	0	1	0	0.0195195	2	1	0
lipid binding	Gene Ontology	28	0.0298135	3	1	0	0.00520648	3	0.22311	1	1	0	0.00851242	3
lipid biosynthesis	Gene Ontology	21	1	0	0.384822	1	0.0281656	2	0.172423	1	1	0	0.039025	2
lipid transport	Gene Ontology	25	0.0223312	3	0.439284	1	0.266151	1	0.201773	1	1	0	1	0
lipoprotein binding	Gene Ontology	10	0.211721	1	1	0	1	0	1	0	0.000345145	3	1	0
lipoxygenase	Gene Ontology	12	0.248378	1	1	0	0.00987785	2	1	0	0.1476	1	0.162591	1
lysosomal cysteine-type endopeptidase	Gene Ontology	19	1	0	0.0100559	3	1	0	1	0	1	0	1	0
lysosome	Gene Ontology	33	0.185494	2	0.0417955	3	0.0632948	2	1	0	0.0718988	2	0.0132182	3
lytic vacuole	Gene Ontology	32	0.177	2	0.0387405	3	0.0599837	2	1	0	0.0681774	2	0.0121805	3
macromolecule biosynthesis	Gene Ontology	47	1	0	0.663538	1	1	0	0.00892312	3	1	0	1	0
macromolecule catabolism	Gene Ontology	96	0.399757	3	0.0248952	6	0.33285	2	1	0	1	0	0.0546387	4
main pathways of carbohydrate metabolism	Gene Ontology	5	0.112114	1	1	0	0.00181363	2	1	0	1	0	1	0
malic enzyme	Gene Ontology	15	0.00572526	3	1	0	0.01507	2	1	0	1	0	1	0
mannosidase	Gene Ontology	10	1	0	0.206406	1	1	0	1	0	0.00802725	2	1	0
Matrix Metalloproteinases	GenMAPP	26	0.461633	1	0.0229395	3	1	0	1	0	1	0	0.319429	1
melanin biosynthesis from tyrosine	Gene Ontology	10	1	0	1	0	1	0	1	0	0.00802725	2	1	0
membrane	Gene Ontology	121	0.944995	1	0.150071	5	0.778541	1	1	0	0.80254	1	0.00940305	6
membrane 2	Gene Ontology	111	0.492498	3	0.727982	2	0.158559	3	1	0	0.18417	3	0.0249241	5
membrane fraction	Gene Ontology	48	0.316179	2	1	0	1	0	1	0	0.0265915	3	0.509091	1
metabolism	Gene Ontology	75	0.0344023	5	0.824741	1	0.0664139	3	0.492558	1	0.0182077	4	0.671673	1
metallocarboxypeptidase	Gene Ontology	9	1	0	0.0187602	2	0.105314	1	1	0	1	0	1	0
metalloexopeptidase	Gene Ontology	15	1	0	0.047659	2	0.16935	1	1	0	1	0	1	0
Methionine_metabolism	KEGG	8	1	0	1	0	1	0	1	0	0.000180148	3	1	0
microsome	Gene Ontology	28	0.143751	2	1	0	1	0	1	0	0.00637782	3	1	0
microtubule-based movement	Gene Ontology	17	1	0	0.325103	1	1	0	1	0	1	0	0.0265607	2
microtubule-based process	Gene Ontology	19	1	0	0.35565	1	1	0	1	0	1	0	0.0325552	2
mitochondrial electron transport chain complex (sensu Eukarya)	Gene Ontology	18	1	0	0.0656571	2	1	0	2.31897e-05	4	1	0	1	0
mitochondrial inner membrane	Gene Ontology	22	1	0	0.0924964	2	0.238346	1	5.03705e-05	4	1	0	1	0
mitochondrial matrix	Gene Ontology	20	0.0826544	2	1	0	0.0257498	2	1	0	1	0	1	0
mitochondrial membrane	Gene Ontology	44	1	0	0.270336	2	0.103311	2	5.13402e-05	5	0.443911	1	0.479013	1
mitochondrial small ribosomal subunit	Gene Ontology	11	0.0286699	2	1	0	0.00836659	2	1	0	1	0	1	0
mitochondrion	Gene Ontology	83	0.0492762	5	0.300886	3	0.0198904	4	0.000937037	5	0.0993085	3	0.708645	1
mitochondrion 2	Gene Ontology	39	0.605303	1	0.22779	2	0.0843689	2	0.000443646	4	1	0	0.438835	1
molecular_function	Gene Ontology	81	0.574938	2	0.0408745	5	0.0183767	4	1	0	1	0	0.00135485	6
molecular_function 18	Gene Ontology	73	0.518816	2	0.00167071	7	1	0	1	0	1	0	0.0235173	4
molecular_function 2	Gene Ontology	83	0.316046	3	0.000764313	8	0.00379727	5	0.171768	2	0.302533	2	0.00153175	6
molecular_function 20	Gene Ontology	73	0.00196485	7	0.503607	2	0.228099	2	0.483248	1	1	0	0.661726	1
molecular_function 23	Gene Ontology	45	0.289992	2	0.647526	1	1	0	1	0	0.0225382	3	0.486699	1
molecular_function 24	Gene Ontology	85	0.60117	2	0.0146993	6	1	0	0.178178	2	0.679153	1	0.0378779	4
molecular_function 27	Gene Ontology	65	0.0202476	5	0.443472	2	0.553694	1	1	0	0.580266	1	0.00290962	5
molecular_function 29	Gene Ontology	103	0.100679	5	0.0105285	7	0.135512	3	0.606786	1	0.158159	3	0.45066	2
molecular_function 3	Gene Ontology	91	0.00163857	8	0.0611984	5	0.0267043	4	0.197622	2	0.033681	4	0.0465923	4
molecular_function 33	Gene Ontology	48	1	0	0.304368	2	1	0	0.351677	1	0.0265915	3	0.158679	2
molecular_function 37	Gene Ontology	43	0.641297	1	1	0	0.0994338	2	1	0	1	0	0.0263259	3
molecular_function 38	Gene Ontology	54	0.367799	2	0.714095	1	0.029729	3	1	0	0.51358	1	1	0
molecular_function 4	Gene Ontology	98	0.205839	4	0.897624	1	0.033688	4	0.588436	1	0.730668	1	0.0580556	4
molecular_function 44	Gene Ontology	76	0.036085	5	0.525062	2	0.00261398	5	0.00499368	4	0.637889	1	0.676537	1
molecular_function 45	Gene Ontology	91	0.00646323	7	0.351171	3	0.310212	2	0.00140499	5	0.033681	4	0.152305	3
molecular_function 46	Gene Ontology	60	0.000108511	8	1	0	0.038708	3	1	0	0.00866019	4	0.589382	1
molecular_function 51	Gene Ontology	53	0.359288	2	0.0353582	4	0.48174	1	0.380393	1	0.157094	2	0.54428	1
molecular_function 52	Gene Ontology	35	0.565719	1	0.0482572	3	0.35178	1	1	0	0.0795332	2	1	0
molecular_function 54	Gene Ontology	37	0.0020461	5	0.0111065	4	0.36768	1	0.283807	1	0.0135113	3	0.00231752	4
molecular_function 63	Gene Ontology	72	0.511465	2	0.812034	1	0.0602956	3	1	0	1	0	0.0225021	4
molecular_function 64	Gene Ontology	93	0.072464	5	0.884915	1	0.319288	2	0.0517668	3	0.711903	1	0.0126393	5
molecular_function unknown	Gene Ontology	24	1	0	0.0186502	3	1	0	1	0	0.273601	1	0.298948	1
monooxygenase	Gene Ontology	28	0.143751	2	1	0	1	0	1	0	0.00637782	3	0.339316	1
monosaccharide catabolism	Gene Ontology	20	0.0826544	2	0.370404	1	0.000120508	4	1	0	0.233797	1	1	0
monosaccharide transport	Gene Ontology	18	1	0	0.340553	1	0.199645	1	1	0	1	0	0.00251493	3
muscle development	Gene Ontology	43	0.272466	2	1	0	0.016525	3	1	0	1	0	0.471212	1
myogenesis	Gene Ontology	27	0.474326	1	1	0	0.00470978	3	1	0	1	0	0.329446	1
NADH dehydrogenase complex (ubiquinone) (sensu Eukarya)	Gene Ontology	10	1	0	0.206406	1	1	0	0.000108851	3	1	0	1	0
neutral amino acid transport	Gene Ontology	15	1	0	0.293118	1	0.16935	1	1	0	1	0	0.00150273	3
nicotinamide metabolism	Gene Ontology	24	0.435326	1	0.106918	2	0.0359271	2	1	0	1	0	0.298948	1
Nitrogen_metabolism	KEGG	13	0.0388353	2	1	0	1	0	1	0	0.158878	1	1	0
N-linked glycosylation	Gene Ontology	27	1	0	1	0	1	0	0.0248842	2	1	0	1	0
nuclear organization and biogenesis	Gene Ontology	24	1	0	0.106918	2	1	0	1	0	1	0	0.0495507	2
Nuclear_Receptors	GenMAPP version 2	21	1	0	0.0855191	2	1	0	0.172423	1	1	0	0.039025	2
nucleocytoplasmic transport	Gene Ontology	18	1	0	0.340553	1	0.199645	1	1	0	1	0	0.00251493	3
oligosaccharide biosynthesis	Gene Ontology	7	1	0	1	0	1	0	1	0	0.0040363	2	1	0
organogenesis 2	Gene Ontology	89	0.626172	2	1	0	0.0248855	4	1	0	0.695964	1	0.733638	1
ossification	Gene Ontology	24	1	0	0.426135	1	1	0	1	0	0.0410281	2	1	0
oxidative phosphorylation	Gene Ontology	17	0.332774	1	1	0	1	0	1	0	0.0218482	2	1	0
oxidative phosphorylation, NADH to ubiquinone	Gene Ontology	11	0.230267	1	1	0	1	0	1	0	0.00962985	2	1	0
Oxidative_phosphorylation	KEGG	39	1	0	0.22779	2	0.383194	1	0.000443646	4	1	0	1	0
oxidoreductase	Gene Ontology	94	0.00200128	8	0.64031	2	0.00636801	5	0.0103665	4	0.130451	3	0.405167	2
oxidoreductase 2	Gene Ontology	68	0.0802363	4	0.208664	3	0.57008	1	0.000383518	5	0.0131914	4	0.265976	2
oxidoreductase 3	Gene Ontology	56	0.0023814	6	0.727099	1	0.00529064	4	0.397018	1	0.526439	1	0.200851	2
oxidoreductase, acting on CH-OH group of donors	Gene Ontology	33	0.00124558	5	1	0	0.00815545	3	1	0	0.0718988	2	0.386552	1
oxidoreduction coenzyme metabolism	Gene Ontology	24	0.435326	1	0.106918	2	0.0359271	2	1	0	1	0	0.298948	1
oxygen binding	Gene Ontology	27	1	0	0.00375734	4	1	0	1	0	1	0	0.00771382	3
oxygen transport	Gene Ontology	19	1	0	0.35565	1	1	0	1	0	0.223513	1	0.00292645	3
oxygen transporter	Gene Ontology	16	1	0	0.000563495	4	1	0	1	0	1	0	0.0237522	2
Pentose_phosphate_pathway	KEGG	13	0.0388353	2	0.0368748	2	0.0115008	2	1	0	1	0	1	0
peroxidase	Gene Ontology	14	0.00473584	3	1	0	0.159001	1	1	0	0.170009	1	0.187017	1
peroxisome	Gene Ontology	18	1	0	1	0	1	0	0.0116456	2	0.213093	1	1	0
Phenylalanine_metabolism	KEGG	13	0.266066	1	1	0	1	0	1	0	0.0132211	2	1	0
Phenylalanine_tyrosine_and_tryptophan_biosynthesis	GenMAPP version 2	3	1	0	1	0	1	0	1	0	0.00076744	2	1	0
Phenylalanine_tyrosine_and_tryptophan_biosynthesis	KEGG	7	1	0	1	0	0.0829027	1	1	0	0.0040363	2	1	0
pheromone binding	Gene Ontology	21	1	0	0.0131325	3	1	0	1	0	0.243946	1	0.267076	1
phosphatase inhibitor	Gene Ontology	8	0.0158807	2	1	0	0.0941771	1	1	0	1	0	0.111538	1
phosphatase regulator	Gene Ontology	10	0.0240608	2	1	0	1	0	1	0	0.124591	1	1	0
phosphorus-oxygen lyase	Gene Ontology	18	1	0	1	0	0.0211902	2	1	0	1	0	1	0
polysaccharide biosynthesis	Gene Ontology	7	1	0	1	0	1	0	1	0	0.0040363	2	1	0
porphyrin metabolism	Gene Ontology	12	0.248378	1	0.0318907	2	0.00987785	2	1	0	1	0	1	0
Prostaglandin_and_leukotriene_metabolism	GenMAPP version 2	8	1	0	1	0	0.00453265	2	1	0	1	0	1	0
Prostaglandin_and_leukotriene_metabolism	KEGG	30	0.0354469	3	0.500667	1	0.00629162	3	1	0	1	0	0.358628	1
protease inhibitor	Gene Ontology	28	0.000602274	5	0.0277196	3	1	0	0.22311	1	0.00637782	3	0.0649596	2
protein binding	Gene Ontology	75	0.00228278	7	0.51798	2	0.237196	2	0.492558	1	1	0	0.671673	1
protein binding 4	Gene Ontology	32	0.177	2	0.523306	1	1	0	1	0	0.00916498	3	0.37738	1
protein biosynthesis	Gene Ontology	47	1	0	0.663538	1	1	0	0.00892312	3	1	0	1	0
protein catabolism	Gene Ontology	96	0.399757	3	0.0248952	6	0.33285	2	1	0	1	0	0.0546387	4
protein kinase inhibitor	Gene Ontology	16	0.0561989	2	1	0	0.0170106	2	1	0	1	0	0.0237522	2
protein phosphatase inhibitor	Gene Ontology	16	0.0561989	2	0.309295	1	0.0170106	2	1	0	1	0	0.0237522	2
protein secretion	Gene Ontology	14	1	0	1	0	1	0	0.118481	1	1	0	0.0185343	2
proteolysis and peptidolysis	Gene Ontology	91	0.367742	3	0.0198068	6	0.310212	2	1	0	1	0	0.0465923	4
purine nucleotide metabolism	Gene Ontology	18	1	0	0.00869407	3	1	0	1	0	1	0	1	0
pyridine nucleotide metabolism	Gene Ontology	24	0.435326	1	0.106918	2	0.0359271	2	1	0	1	0	0.298948	1
Pyruvate_metabolism	KEGG	21	0.0016981	4	1	0	0.228848	1	1	0	0.0322223	2	1	0
receptor binding	Gene Ontology	98	0.677976	2	0.0271545	6	1	0	0.220622	2	0.730668	1	0.0580556	4
regulation of blood pressure	Gene Ontology	23	0.421696	1	1	0	0.0332567	2	1	0	1	0	0.28848	1
regulation of cell growth	Gene Ontology	16	0.316685	1	1	0	1	0	1	0	0.0195195	2	1	0
regulation of heart	Gene Ontology	17	1	0	1	0	0.0190516	2	1	0	1	0	1	0
regulation of neurotransmitter levels	Gene Ontology	19	1	0	1	0	1	0	1	0	1	0	0.0325552	2
respiratory chain complex IV (sensu Eukarya)	Gene Ontology	25	1	0	0.114341	2	0.266151	1	3.46722e-06	5	0.283228	1	1	0
response to biotic stimulus	Gene Ontology	89	0.163359	4	0.00493478	7	0.669261	1	0.553254	1	1	0	0.00216919	6
response to biotic stimulus 2	Gene Ontology	63	0.000852663	7	0.42782	2	0.542428	1	0.434118	1	0.568854	1	0.238704	2
response to biotic stimulus 3	Gene Ontology	54	0.367799	2	0.00876451	5	0.488151	1	0.385984	1	0.51358	1	0.00130781	5
response to chemical substance	Gene Ontology	21	0.0897652	2	0.384822	1	1	0	1	0	0.0322223	2	1	0
response to drug	Gene Ontology	13	0.266066	1	1	0	1	0	1	0	0.0132211	2	1	0
response to external stimulus 2	Gene Ontology	91	0.0224239	6	0.160751	4	0.677432	1	1	0	1	0	0.152305	3
response to external stimulus 3	Gene Ontology	72	0.00790661	6	0.0266609	5	0.591006	1	0.137344	2	1	0	0.000743368	6
response to external stimulus 4	Gene Ontology	70	0.496545	2	0.00131876	7	0.580672	1	0.131268	2	0.238691	2	0.00397812	5
response to oxidative stress	Gene Ontology	23	0.421696	1	0.0166893	3	0.247728	1	1	0	0.263846	1	0.0459378	2
response to wounding	Gene Ontology	11	0.230267	1	0.224555	1	1	0	1	0	1	0	0.0117741	2
Rho small monomeric GTPase	Gene Ontology	15	1	0	0.047659	2	1	0	1	0	1	0	0.198964	1
Ribosomal Proteins	GenMAPP	45	1	0	0.647526	1	1	0	5.705e-05	5	1	0	1	0
ribosome	Gene Ontology	28	1	0	0.47696	1	1	0	0.00212923	3	1	0	1	0
Ribosome	KEGG	51	1	0	0.693426	1	1	0	7.20984e-06	6	1	0	1	0
scavenger receptor	Gene Ontology	13	1	0	0.0368748	2	1	0	1	0	0.158878	1	1	0
secretory granule	Gene Ontology	15	0.30021	1	1	0	0.01507	2	1	0	1	0	1	0
Selenoamino_acid_metabolism	KEGG	11	0.230267	1	1	0	1	0	1	0	0.00962985	2	1	0
serine protease inhibitor	Gene Ontology	18	0.00939544	3	0.340553	1	1	0	0.149715	1	0.00186413	3	1	0
serpin	Gene Ontology	13	0.0388353	2	0.259625	1	1	0	1	0	0.000736734	3	1	0
signal recognition particle	Gene Ontology	15	1	0	0.293118	1	1	0	0.126394	1	1	0	0.0210752	2
signal transducer 2	Gene Ontology	84	0.594727	2	0.0464644	5	0.278297	2	1	0	0.674808	1	0.712966	1
small GTPase mediated signal transduction	Gene Ontology	32	0.533463	1	0.00678616	4	1	0	1	0	1	0	0.0817348	2
small monomeric GTPase	Gene Ontology	28	0.143751	2	0.00426939	4	1	0	1	0	1	0	0.339316	1
soluble fraction	Gene Ontology	21	0.0897652	2	1	0	1	0	1	0	0.00287643	3	1	0
Steroid Biosynthesis	GenMAPP	6	1	0	1	0	1	0	1	0	1	0	0.00367491	2
steroid dehydrogenase	Gene Ontology	10	0.0240608	2	1	0	0.116316	1	1	0	0.124591	1	0.137439	1
sterol metabolism	Gene Ontology	10	1	0	0.206406	1	0.116316	1	1	0	0.00802725	2	1	0
Stilbene_coumarine_and_lignin_biosynthesis	KEGG	10	1	0	1	0	1	0	1	0	0.00802725	2	1	0
striated muscle thick filament	Gene Ontology	13	1	0	0.259625	1	1	0	0.000234581	3	1	0	1	0
structural constituent of eye lens	Gene Ontology	18	0.348486	1	1	0	0.0211902	2	1	0	1	0	0.23377	1
structural constituent of ribosome	Gene Ontology	50	1	0	0.686211	1	0.462028	1	0.0105408	3	1	0	0.523479	1
structural molecule	Gene Ontology	55	0.730838	1	1	0	0.494483	1	1	0	1	0	0.0486089	3
Styrene_degradation	KEGG	17	0.00805214	3	1	0	0.18967	1	1	0	0.202534	1	0.222337	1
sugar binding	Gene Ontology	39	0.0669294	3	0.0132364	4	0.0843689	2	0.296647	1	0.0955051	2	0.00030591	5
sulfur amino acid metabolism	Gene Ontology	8	1	0	1	0	1	0	1	0	0.00522665	2	1	0
Sulfur_metabolism	KEGG	6	0.0092135	2	1	0	1	0	1	0	1	0	1	0
superoxide dismutase	Gene Ontology	19	1	0	1	0	0.0234238	2	1	0	0.223513	1	1	0
synaptic junction	Gene Ontology	19	1	0	1	0	0.209499	1	1	0	1	0	0.0325552	2
synaptic transmission	Gene Ontology	43	1	0	0.630756	1	0.413102	1	1	0	0.436423	1	0.0263259	3
synaptosome	Gene Ontology	21	0.0897652	2	1	0	1	0	1	0	0.00287643	3	1	0
taxis	Gene Ontology	28	0.486721	1	0.0277196	3	1	0	0.026609	2	1	0	0.000841028	4
T-cell receptor	Gene Ontology	12	1	0	0.0318907	2	1	0	1	0	0.1476	1	1	0
telomerase-dependent telomere maintenance	Gene Ontology	23	0.421696	1	0.0996329	2	0.247728	1	1	0	0.263846	1	0.0459378	2
telomere maintenance	Gene Ontology	23	0.421696	1	0.0996329	2	0.247728	1	1	0	0.263846	1	0.0459378	2
Toll-like_receptor_signaling_pathway	KEGG	160	1	0	0.0792936	7	0.864491	1	0.423487	2	0.883609	1	0.00267851	8
transferase, transferring nitrogenous groups	Gene Ontology	9	1	0	1	0	1	0	1	0	0.00655825	2	1	0
transferase, transferring pentosyl groups	Gene Ontology	12	1	0	0.0318907	2	1	0	1	0	0.1476	1	1	0
transmission of nerve impulse	Gene Ontology	45	1	0	0.647526	1	0.427513	1	1	0	0.4513	1	0.0295477	3
transport	Gene Ontology	96	0.0804108	5	0.651671	2	0.116413	3	0.580862	1	0.365488	2	0.0031459	6
transporter	Gene Ontology	57	0.0481193	4	1	0	0.156925	2	0.402461	1	0.532742	1	0.0016552	5
tricarboxylic acid cycle	Gene Ontology	5	0.112114	1	1	0	0.00181363	2	1	0	1	0	1	0
Tryptophan_metabolism	GenMAPP version 2	8	0.0158807	2	1	0	1	0	1	0	1	0	1	0
Tryptophan_metabolism	KEGG	43	0.0839144	3	1	0	1	0	0.321651	1	0.0200389	3	1	0
tyrosine metabolism	Gene Ontology	10	1	0	1	0	1	0	1	0	0.00802725	2	1	0
Tyrosine_metabolism	KEGG	37	0.0122293	4	1	0	0.36768	1	1	0	0.0135113	3	0.421917	1
Urea_cycle_and_metabolism_of_amino_groups	KEGG	13	1	0	0.259625	1	0.0115008	2	1	0	0.158878	1	1	0
vacuolar membrane	Gene Ontology	23	0.421696	1	0.0996329	2	0.0332567	2	1	0	0.263846	1	0.00497494	3
vacuole	Gene Ontology	33	0.185494	2	0.0417955	3	0.0632948	2	1	0	0.0718988	2	0.0132182	3
water transport	Gene Ontology	19	1	0	1	0	1	0	1	0	0.223513	1	0.00292645	3
Table:
This table summarises the pathway analysis in WAT, liver and muscle based on the microarray analysis of POKO vs. ob/ob mice. Columns are: name of pathway, its source, the number of genes on that pathway that could be mapped to the
microarray, and then pairs of p value: binominal p and hits for each sample (lists of genes that are both in the pathway and 1.3-fold up- or 1.3-fold down-regulated). Where a p value is less than 0.05, it is highlighted in colour.
Hits indicates the number of genes found both on the list of expression changes from the microarray and on the pathway.
